# Supplementary material for: The Reaction Mechanism Study for the F3 System
Source: Hindawi journal article supplement (doi:10.1155/2022/7088063), 2022-01-01
Supplement: f1 [file 7088063.f1.pdf]

# The Reaction Mechanisms study For the $F_3$ system

Dequan Wang<sup>a\*||</sup>, Nan Gao<sup>c||</sup>, Hongmei Yu<sup>d</sup>, Yuxuan Bai<sup>e</sup>, Jing Cao<sup>a</sup>, Chunmei Hu<sup>b\*</sup>,  
Yanchun Li<sup>a</sup>, Huiling Liu<sup>a</sup>, Xuri Huang<sup>a</sup>

<sup>a</sup>Laboratory of Theoretical and Computational Chemistry, Institute of Theoretical Chemistry, Collage of Chemistry, Jilin University, Changchun, People's Republic of China

<sup>b</sup>Hematology and Oncology Department, The Second Hospital, Jilin University, Changchun, People's Republic of China

<sup>c</sup>Department of Thoracic Surgery, China-Japan Union Hospital of Jilin University, Changchun, People's Republic of China

<sup>d</sup>High Performance Computing Center of Jilin University, People's Republic of China

<sup>e</sup>College of Life Science, Sichuan Agricultural University, Ya 'an, People's Republic of China

E-mails: dequan\_wang@jlu.edu.cn; hucm@jlu.edu.cn

<sup>||</sup>these authors contributed equally to this work.

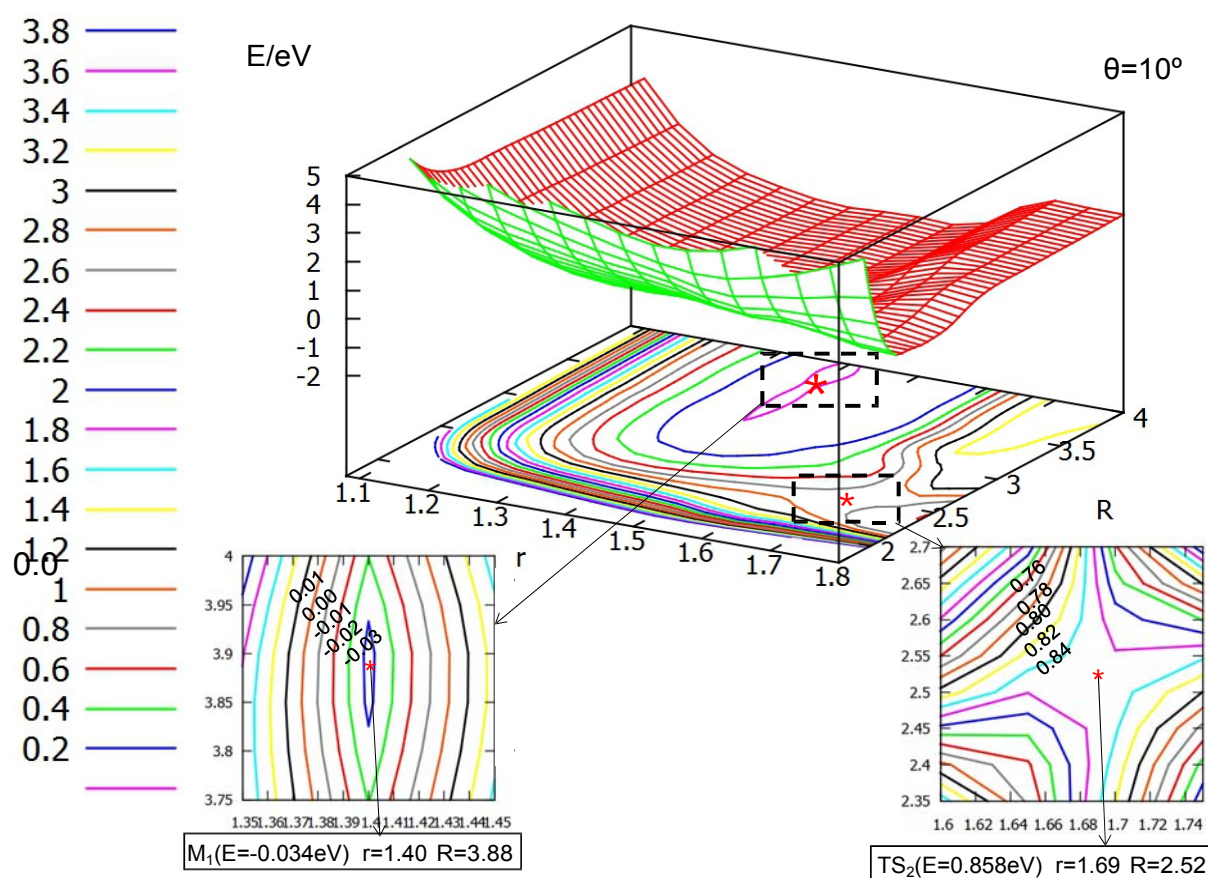

Figure S1: Adiabatic potential energy surface (in eV) and contour plots of the potential energy surface for the ground state of  $F_3$  as the function of  $r$  and  $R$  (in  $\text{\AA}$ ) for  $\theta = 10^\circ$ . The importance isomer and transition state are shown in the lower panels.

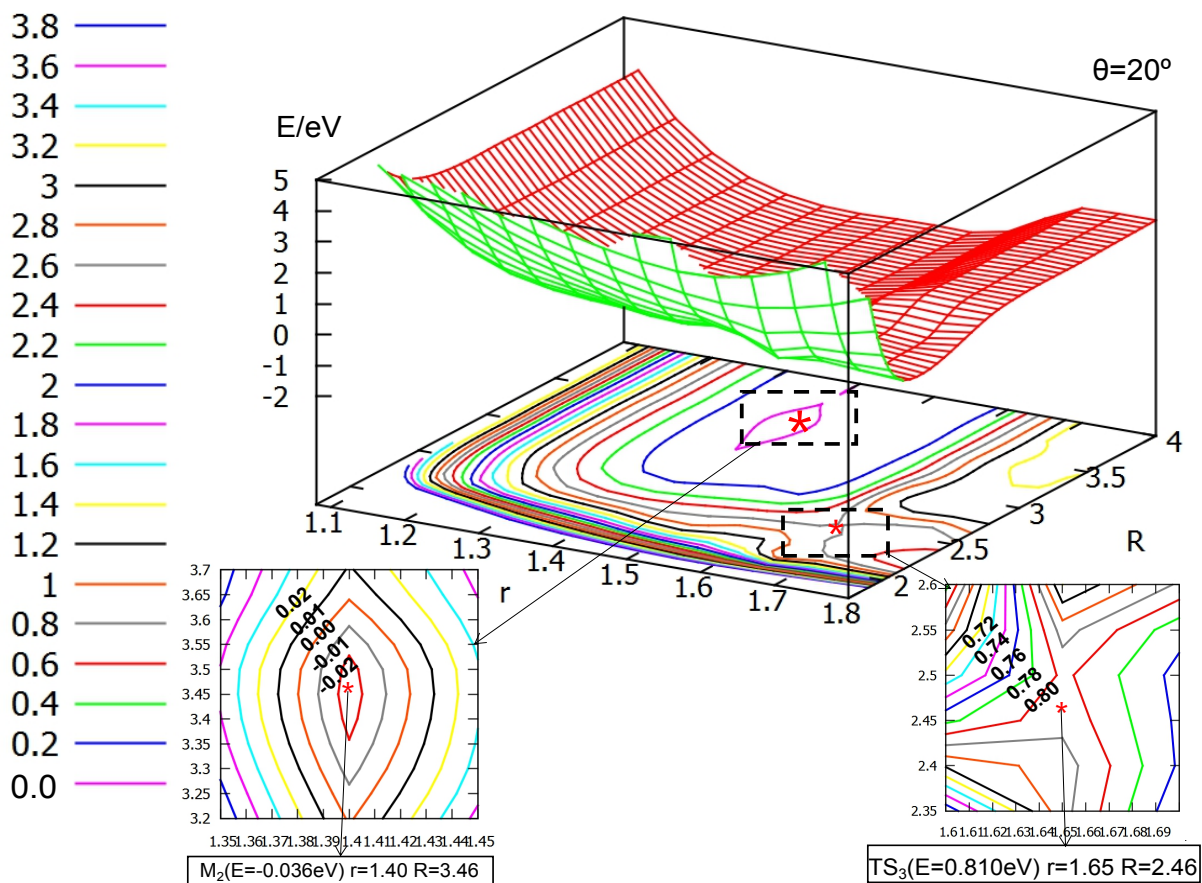

Figure 2: Adiabatic potential energy surface (in eV) and contour plots of the potential energy surface for the ground state of  $F_3$  as the function of  $r$  and  $R$  (in Å) for  $\theta = 20^\circ$ . The importance isomer and transition state are shown in the lower panels.

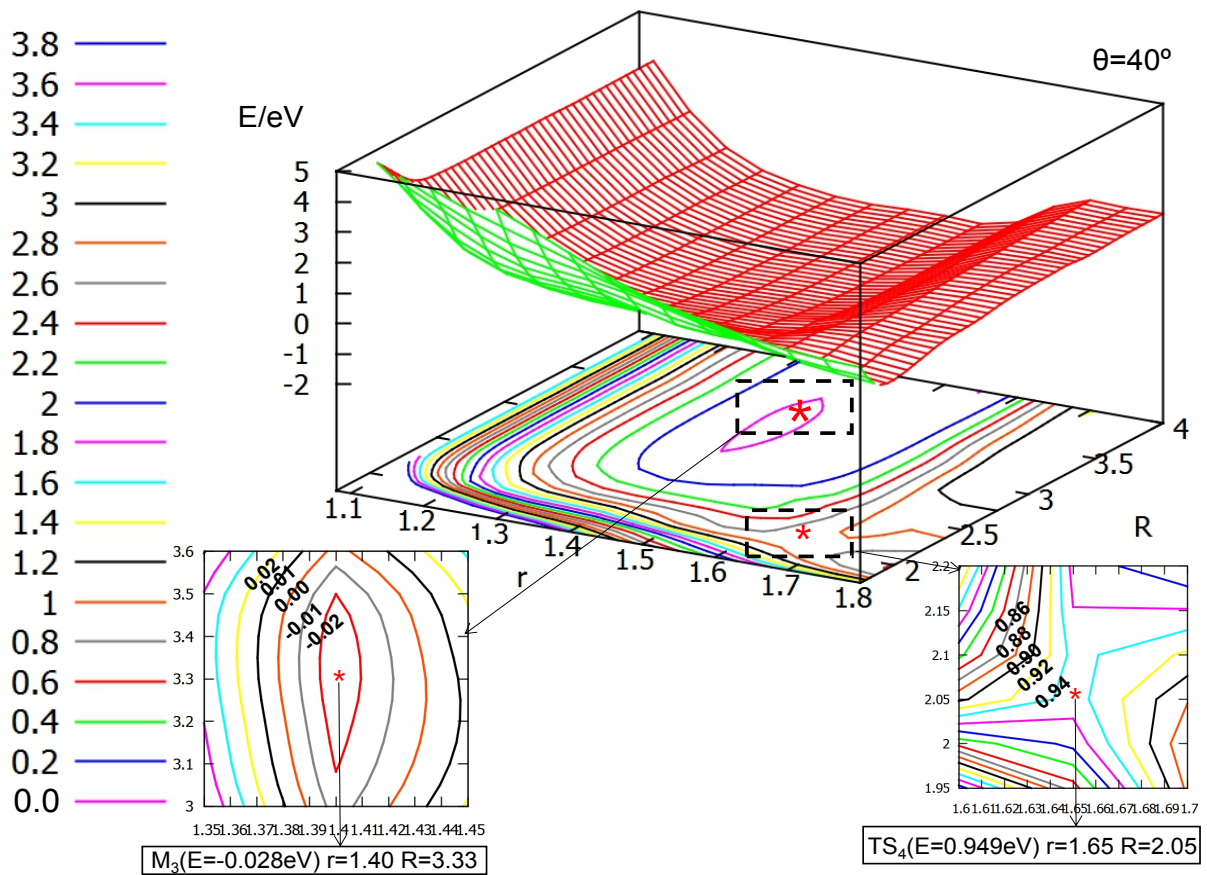

Figure 3: Adiabatic potential energy surface (in eV) and contour plots of the potential energy surface for the ground state of  $F_3$  as the function of  $r$  and  $R$  (in  $\text{\AA}$ ) for  $\theta = 40^\circ$ . The importance isomer and transition state are shown in the lower panels.

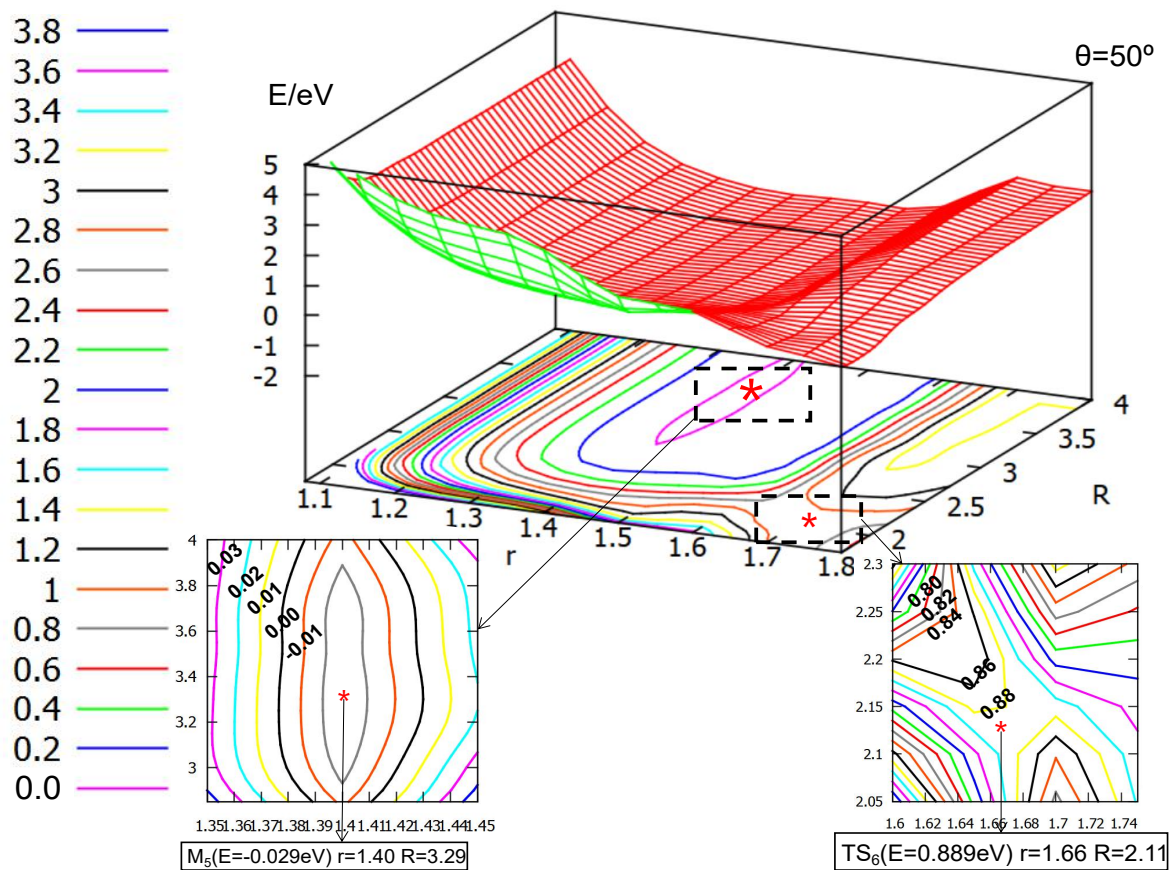

Figure 4: Adiabatic potential energy surface (in eV) and contour plots of the potential energy surface for the ground state of  $F_3$  as the function of  $r$  and  $R$  (in Å) for  $\theta = 50^\circ$ . The importance isomer and transition state are shown in the lower panels.



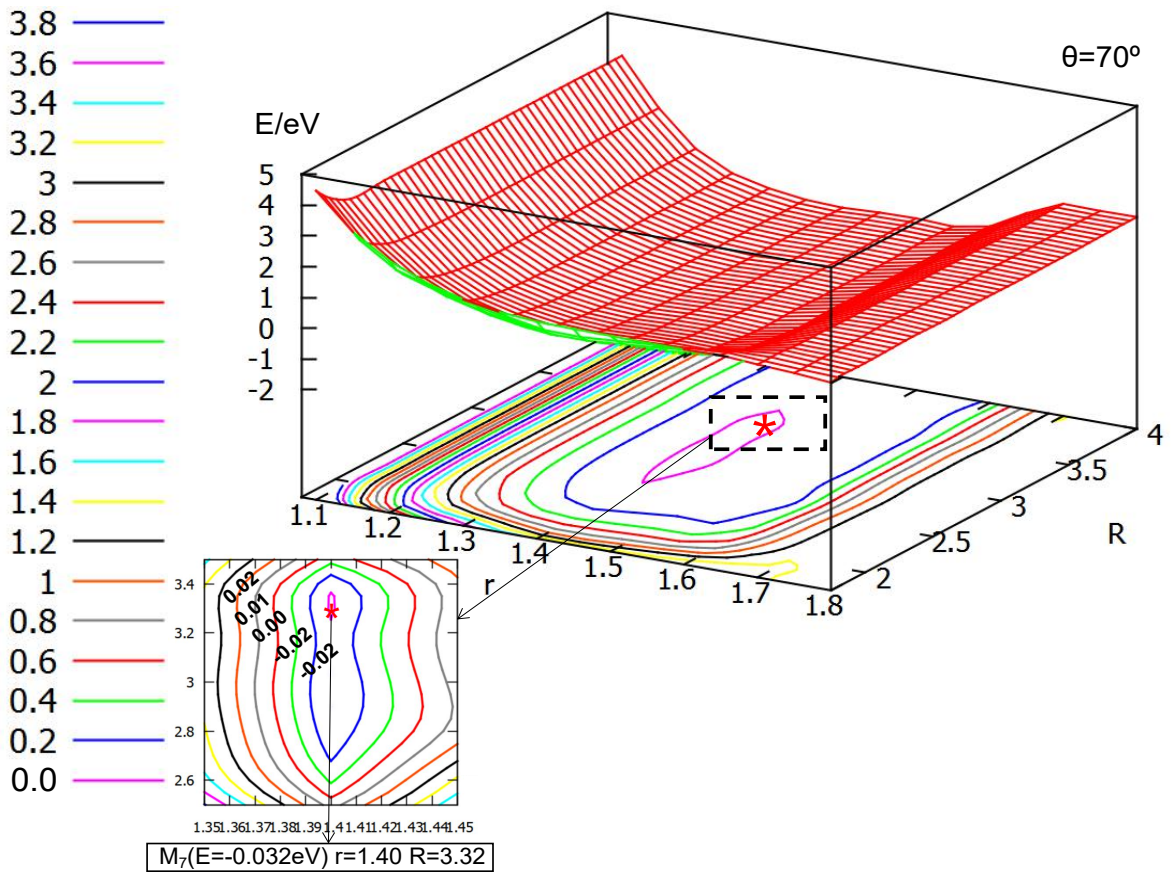

Figure 5: Adiabatic potential energy surface (in eV) and contour plots of the potential energy surface for the ground state of  $F_3$  as the function of  $r$  and  $R$  (in  $\text{\AA}$ ) for  $\theta = 70^\circ$ . The importance isomer is shown in the lower panels.

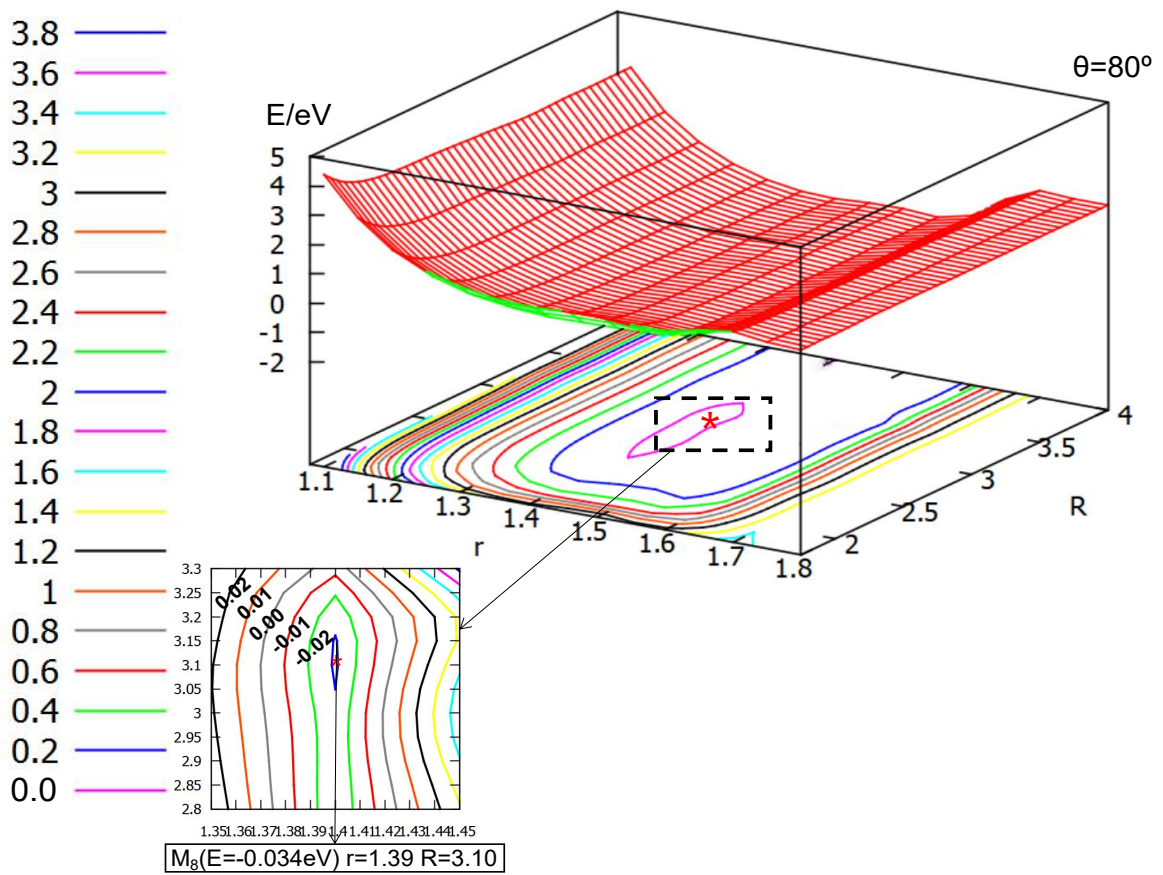

Figure 6: Adiabatic potential energy surface (in eV) and contour plots of the potential energy surface for the ground state of  $F_3$  as the function of  $r$  and  $R$  (in Å) for  $\theta = 80^\circ$ . The importance isomer is shown in the lower panels.
